# Supplementary material for: Polybenzimidazole based film forming polymeric ionic liquids: synthesis and effects of cation–anion variation on their physical properties
Source: Royal Society of Chemistry journal article supplement (doi:10.1039/c3py01709e), 2014-01-01
Supplement: c3py01709e1.pdf [file c3py01709e1.pdf]

## Supporting Information

### Polybenzimidazole based film forming polymeric ionic liquids: Synthesis and effects of cation-anion variation on their physical properties

Rupesh S. Bhavsar, Santosh C. Kumbharkar, Anita S. Rewar and Ulhas K. Kharul\*

Polymer Science and Engineering Division, CSIR-National Chemical Laboratory, Dr. Homi Bhabha Road, Pune- 411008, INDIA. Tel: +91-20-25902180, Fax: +91-20-25902618

Email: [uk.kharul@ncl.res.in](mailto:uk.kharul@ncl.res.in)

#### Film forming ability of PILs

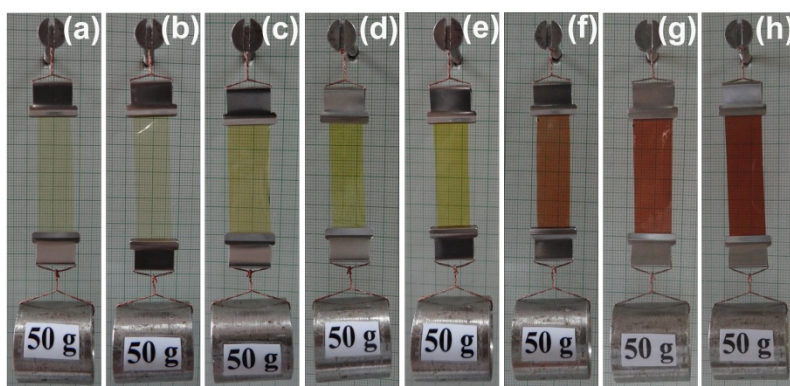

**Fig. S1** Photograph of film forming PILs (a: [TMPBI-I][Tf<sub>2</sub>N]; b: [TMPBI-BuI][Tf<sub>2</sub>N]; c: [TMPBI-BuI][TFAc]; d: [TMPBI-BuI][HFB]; e: [TMPBI-BuI][MS]; f: [TMPBI-BuI][TFMS], g: [TMPBI-BuI][PTS] h: [TMPBI-BuI][NO<sub>3</sub>])

This figure shows photograph of PILs films those are not covered in the Fig. 5 of the main manuscript.

## UV-VIS spectra of PILs

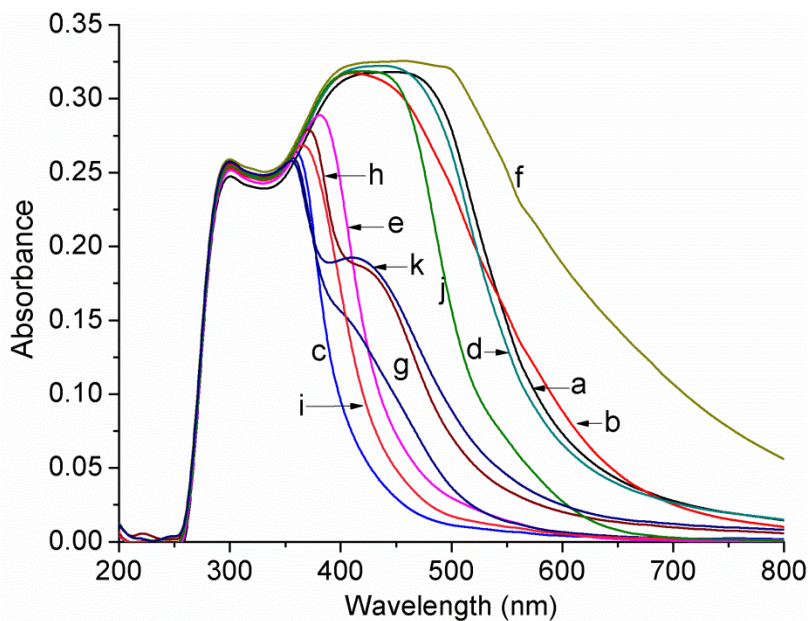

**Fig. S2** UV-vis spectra of PILs possessing common polycation (a: [TMPBI-BuI][Ac]; b: [TMPBI-BuI][Bz]; c: [TMPBI-BuI][HFB]; d: [TMPBI-BuI][TFAc]; e: [TMPBI-BuI][BF<sub>4</sub>]; f: [TMPBI-BuI][NO<sub>3</sub>]; g: [TMPBI-BuI][MS]; h: [TMPBI-BuI][PTS]; i: [TMPBI-BuI][Tf<sub>2</sub>N]; j: [TMPBI-BuI][I]; k: [TMPBI-BuI][TFMS]).
